# Supplementary material
Source: publisher site journal article supplement (https://kjim.org/upload/media/kjim-2023-303-Supplementary-Table-5.pdf)
Supplement: Supplementary file 1 [file kjim-2023-303-Supplementary-Table-5.pdf]

**Supplementary Table 5. The effect of metformin use on mortality during TB treatment before and after PS matching in men**

|                    | Men              |                  |                  |                  |                  |
|--------------------|------------------|------------------|------------------|------------------|------------------|
|                    | Crude            | Model 1          | Model 2          | Model 3          | Model 4          |
|                    | HR (95% CI)      | aHR (95% CI)     | aHR (95% CI)     | aHR (95% CI)     | aHR (95% CI)     |
| Before PS matching |                  |                  |                  |                  |                  |
| Metformin use      |                  |                  |                  |                  |                  |
| No                 | 1.00 (Ref)       |
| Yes                | 0.54 (0.49–0.60) | 0.67 (0.60–0.74) | 0.68 (0.61–0.75) | 0.73 (0.65–0.81) | 0.71 (0.64–0.79) |
| <i>p</i> value     | < 0.01           | < 0.01           | < 0.01           | < 0.01           | < 0.01           |
| After PS matching  |                  |                  |                  |                  |                  |
| Metformin use      |                  |                  |                  |                  |                  |
| No                 | 1.00 (Ref)       |
| Yes                | 0.76 (0.66–0.88) | 0.75 (0.65–0.87) | 0.77 (0.66–0.89) | 0.77 (0.67–0.90) | 0.76 (0.65–0.89) |
| <i>p</i> value     | < 0.01           | < 0.01           | < 0.01           | < 0.01           | < 0.01           |

AFB, acid-fast bacilli; aHR, adjusted hazard ratio; CCI, Charlson Comorbidity Index; CI, confidence interval; HR, hazard ratio; PPM, public-private mix; PS, propensity score; Ref, reference; TB, tuberculosis.

Model 1 was adjusted for age, region, nationality, and household income.

Model 2 was adjusted for disability, lesion site of TB, TB history, PPM hospitalization, AFB smear and culture positivity, and notification year in addition to the variables in model 1.

Model 3 was adjusted for CCI and presence of comorbidities in addition to the variables in model 2.

Model 4 was adjusted for use of anti-diabetic medications including sulfonylurea, insulin, and other anti-diabetic drugs in addition to the variables in model 3.
